# Supplementary material for: Probiotic Effects of Bacillus subtilis on Growth Performance and Intestinal Microecological Balance of Growing-to-Finishing Pigs
Source: Hindawi journal article supplement (doi:10.1155/2023/7150917), 2023-04-07
Supplement: f1 [file 7150917.f1.docx]

**TABLE S1** The tags and OTUs information of different samples based on the 16S rDNA gene sequence

| Sample name | Raw Reads | Clean Reads | Raw Tags | Clean Tags | Effective Tags | Effective Ratio, % | OTUs |
| --- | --- | --- | --- | --- | --- | --- | --- |
| Ct-1 | 121942 | 121078 | 116152 | 115054 | 98906 | 81011 | 1074 |
| Ct-2 | 125428 | 124597 | 119955 | 118976 | 102371 | 81.62 | 1194 |
| Ct-3 | 128561 | 127727 | 122830 | 121659 | 104364 | 81.18 | 1136 |
| E1-1 | 131808 | 130906 | 122185 | 120952 | 104850 | 79.55 | 1027 |
| E1-2 | 124253 | 123397 | 118953 | 118182 | 101115 | 81.38 | 1063 |
| E1-3 | 125944 | 125018 | 120514 | 119659 | 102923 | 81.72 | 1095 |
| E2-1 | 115879 | 115408 | 110841 | 109932 | 94884 | 81.88 | 1009 |
| E2-2 | 135944 | 135000 | 127946 | 126891 | 108592 | 79.88 | 1071 |
| E2-3 | 131519 | 130631 | 125755 | 124884 | 106338 | 80.85 | 1083 |

**TABLE S2** The relative abundance (top 10) of the bacterial at phylum level of different samples

| Phylum | Ct-1 | Ct-2 | Ct-3 | E1-1 | E1-2 | E1-3 | E2-1 | E2-2 | E2-3 |
| --- | --- | --- | --- | --- | --- | --- | --- | --- | --- |
| Firmicutes | 57.675 | 52.9809 | 65.6312 | 52.1506 | 42.999 | 40.8545 | 59.0553 | 59.4551 | 57.4663 |
| Proteobacteria | 1.1356 | 2.284 | 1.1705 | 11.6512 | 21.014 | 23.4181 | 8.6892 | 15.3775 | 15.8396 |
| Actinobacteria | 31.3509 | 27.2835 | 23.0789 | 27.8919 | 11.5891 | 12.124 | 23.5498 | 16.6799 | 17.6515 |
| Cyanobacteria | 0.5628 | 0.5286 | 0.5913 | 0.6431 | 0.502 | 0.6493 | 0.9715 | 0.6439 | 0.7239 |
| Bacteroidetes | 5.8268 | 7.2255 | 6.32 | 5.8381 | 21.6635 | 20.6247 | 5.9766 | 6.0352 | 6.2163 |
| Euryarchaeota | 1.7547 | 7.2296 | 1.3783 | 0.4907 | 0.7023 | 0.3994 | 0.0845 | 0.3052 | 0.2378 |
| Spirochaetes | 0.6351 | 1.2022 | 0.797 | 0.1503 | 0.2047 | 0.3815 | 0.3473 | 0.23 | 0.4061 |
| Patescibacteria | 0.0161 | 0.0367 | 0.024 | 0.0835 | 0.0969 | 0.116 | 0.0422 | 0.0397 | 0.0694 |
| Epsilonbacteraeota | 0.004 | 0.0041 | 0.004 | 0.0251 | 0.066 | 0.0513 | 0.0446 | 0.0439 | 0.1178 |
| Planctomycetes | 0.008 | 0.0408 | 0.012 | 0.0125 | 0.011 | 0.0112 | 0.0446 | 0.069 | 0.1242 |

**TABLE S3** The relative abundance (top 10) of the bacterial at genus level of different samples

| Genus | Ct-1 | Ct-2 | Ct-3 | E1-1 | E1-2 | E1-3 | E2-1 | E2-2 | E2-3 |
| --- | --- | --- | --- | --- | --- | --- | --- | --- | --- |
| Lactobacillus | 1.3386 | 1.3492 | 1.7578 | 3.7292 | 2.5692 | 2.548 | 1.9664 | 1.6766 | 1.5257 |
| Bacillus | 0.5507 | 0.5348 | 0.5693 | 0.9292 | 0.9225 | 0.8411 | 1.6379 | 1.1916 | 1.0332 |
| Corynebacterium_1 | 31.0956 | 26.9549 | 22.7893 | 26.7477 | 10.627 | 11.0598 | 22.9749 | 15.6263 | 16.8329 |
| Atopostipes | 21.4902 | 17.6699 | 19.8869 | 3.6165 | 3.9672 | 3.3735 | 9.8437 | 10.0865 | 11.0943 |
| Lysinibacillus | 0.2713 | 0.6123 | 0.3156 | 18.287 | 17.0776 | 16.6957 | 9.5528 | 11.3973 | 15.5114 |
| Oblitimonas | 0.1427 | 0.1612 | 0.1338 | 3.249 | 9.0507 | 7.1263 | 1.5511 | 9.7876 | 7.5358 |
| Kurthia | 0.0603 | 0.2123 | 0.0859 | 0.735 | 0.1651 | 0.2008 | 14.1872 | 12.7686 | 7.2306 |
| Clostridium_sensu_stricto_1 | 7.4428 | 6.1621 | 9.2004 | 2.5161 | 1.4751 | 1.3543 | 2.2433 | 2.7093 | 2.1212 |
| Terrisporobacter | 6.0439 | 5.3987 | 8.5053 | 2.7311 | 1.7282 | 1.4346 | 2.9332 | 3.0646 | 2.803 |
| Streptococcus | 1.2482 | 1.9452 | 2.0075 | 6.5752 | 4.2777 | 4.0272 | 4.618 | 4.4694 | 4.1898 |
